# Supplementary material
Source: publisher figshare collection journal article supplement (https://geolsoc.figshare.com/articles/dataset/_/3453419)
Supplement: Supplementary file 1 [file 1]

**Table 3. U-Th-Pb isotopic data for sample MRC344.**

| Sample<br>* | Compositional Parameters |                                  |                             |            |             |                                         | Radiogenic Isotope Ratios               |                                         |       |                                        |       |                                        |       | Isotopic Ages  |                                         |      |                                        |      |                                        |             |
|-------------|--------------------------|----------------------------------|-----------------------------|------------|-------------|-----------------------------------------|-----------------------------------------|-----------------------------------------|-------|----------------------------------------|-------|----------------------------------------|-------|----------------|-----------------------------------------|------|----------------------------------------|------|----------------------------------------|-------------|
|             | Th<br>U                  | <sup>206</sup> Pb*<br>x10-13 mol | mol %<br><sup>206</sup> Pb* | Pb*<br>Pbc | Pbc<br>(pg) | <sup>206</sup> Pb/<br><sup>204</sup> Pb | <sup>208</sup> Pb/<br><sup>206</sup> Pb | <sup>207</sup> Pb/<br><sup>206</sup> Pb | % err | <sup>207</sup> Pb/<br><sup>235</sup> U | % err | <sup>206</sup> Pb/<br><sup>238</sup> U | % err | corr.<br>coef. | <sup>207</sup> Pb/<br><sup>206</sup> Pb | ±    | <sup>207</sup> Pb/<br><sup>235</sup> U | ±    | <sup>206</sup> Pb/<br><sup>238</sup> U | ±           |
|             | †                        | §                                | §                           | §          | §           | #                                       | **                                      | **                                      | ††    | **                                     | ††    | **                                     | ††    |                | §§                                      | ††   | §§                                     | ††   | §§                                     | ††          |
| z1          | 0.627                    | 8.4572                           | 99.92%                      | 380        | 0.58        | 22342                                   | 0.197                                   | 0.05689                                 | 0.17  | 0.6108                                 | 0.22  | 0.077865                               | 0.100 | 0.694          | 486.91                                  | 3.76 | 484.05                                 | 0.86 | <b>483.44</b>                          | <b>0.47</b> |
| z2          | 0.353                    | 2.8468                           | 99.76%                      | 120        | 0.57        | 7597                                    | 0.111                                   | 0.05683                                 | 0.11  | 0.6100                                 | 0.19  | 0.077845                               | 0.090 | 0.932          | 484.54                                  | 2.41 | 483.55                                 | 0.72 | <b>483.34</b>                          | <b>0.42</b> |
| z3          | 0.407                    | 2.0402                           | 99.71%                      | 103        | 0.48        | 6432                                    | 0.127                                   | 0.05683                                 | 0.12  | 0.6109                                 | 0.20  | 0.077961                               | 0.088 | 0.909          | 484.52                                  | 2.70 | 484.12                                 | 0.76 | <b>484.03</b>                          | <b>0.41</b> |
| z5          | 0.423                    | 1.8008                           | 98.47%                      | 19         | 2.38        | 1118                                    | 0.133                                   | 0.05692                                 | 0.21  | 0.6116                                 | 0.30  | 0.077926                               | 0.117 | 0.852          | 488.01                                  | 4.62 | 484.55                                 | 1.16 | <b>483.82</b>                          | <b>0.54</b> |
| z6          | 0.787                    | 3.7671                           | 99.63%                      | 88         | 1.15        | 4969                                    | 0.246                                   | 0.05685                                 | 0.14  | 0.6126                                 | 0.34  | 0.078162                               | 0.277 | 0.915          | 485.25                                  | 3.06 | 485.22                                 | 1.30 | 485.22                                 | 1.30        |
| z7          | 0.416                    | 3.1163                           | 99.92%                      | 388        | 0.20        | 24071                                   | 0.130                                   | 0.05681                                 | 0.09  | 0.6103                                 | 0.17  | 0.077916                               | 0.087 | 0.959          | 483.75                                  | 2.00 | 483.76                                 | 0.66 | <b>483.76</b>                          | <b>0.40</b> |

\* z1, z2 etc. are labels for fractions composed of single zircon grains or fragments; all fractions annealed and chemically abraded after Mattinson (2005).

† Model Th/U ratio calculated from radiogenic <sup>208</sup>Pb/<sup>206</sup>Pb ratio and <sup>207</sup>Pb/<sup>235</sup>U age.

§ Pb\* and Pbc represent radiogenic and common Pb, respectively; mol % <sup>206</sup>Pb\* with respect to radiogenic, blank and initial common Pb.

# Measured ratio corrected for spike and fractionation only.

\*\* Corrected for fractionation, spike, and common Pb; up to 2 pg of common Pb was assumed to be procedural blank: <sup>206</sup>Pb/<sup>204</sup>Pb = 18.60 ± 0.80%;

<sup>207</sup>Pb/<sup>204</sup>Pb = 15.69 ± 0.32%; <sup>208</sup>Pb/<sup>204</sup>Pb = 38.51 ± 0.74% (all uncertainties 1-sigma). Excess over blank was assigned to initial common Pb.

†† Errors are 2-sigma, propagated using the algorithms of Schmitz and Schoene (2007).

§§ Calculations are based on the decay constants of Jaffey et al. (1971). <sup>206</sup>Pb/<sup>238</sup>U and <sup>207</sup>Pb/<sup>206</sup>Pb ages corrected for initial disequilibrium in <sup>230</sup>Th/<sup>238</sup>U using

Th/U [magma] = 3 using the algorithms of Schärer (1984).

Dates in bold are those included in weighted mean calculations. See text for discussion.
